# Supplementary material for: Density functional theoretical study of the tungsten-doped In2O3 catalyst for CO2 hydrogenation to methanol
Source: Royal Society of Chemistry journal article supplement (doi:10.1039/d2cp03842k), 2022-01-01
Supplement: d2cp03842k2.pdf [file d2cp03842k2.pdf]

**Supporting Information**

**Density functional theoretical study of the  
tungsten-doped In<sub>2</sub>O<sub>3</sub> catalyst for CO<sub>2</sub>  
hydrogenation to methanol**

Rui Zou,<sup>a</sup> Kaihang Sun,<sup>a</sup> Chenyang Shen<sup>b</sup> and Chang-jun Liu<sup>\*ab</sup>

<sup>a</sup> School of Chemical Engineering and Technology, Tianjin University, Tianjin 300350, China

<sup>b</sup> Collaborative Innovation Center of Chemical Science & Engineering, Tianjin University, Tianjin  
300072, China

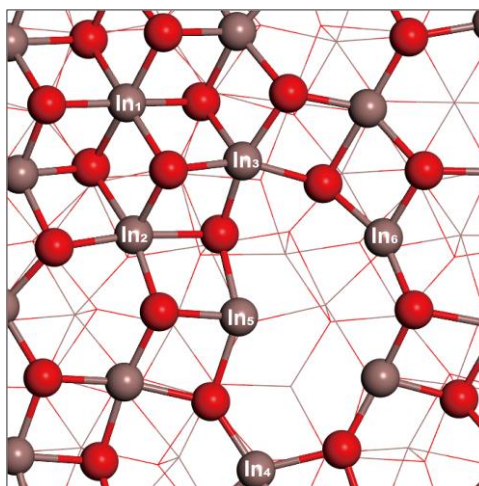

**Fig. S1** The doping positions of W on the In<sub>2</sub>O<sub>3</sub>\_D model. Red: O atoms; brown: In atoms.

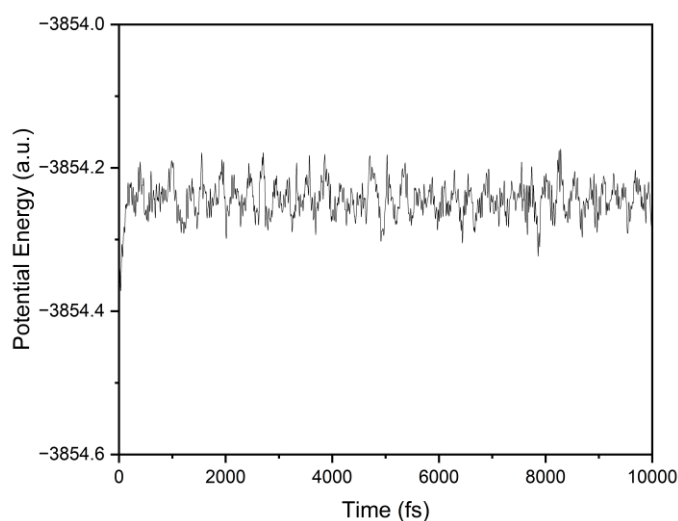

**Fig. S2** The potential energy of the W-In<sub>2</sub>O<sub>3</sub>\_D model during the AIMD simulation. The ab initio molecular dynamics (AIMD) simulation was carried out using the CP2K package with a cutoff of 350 Ry. The AIMD simulation was performed in the canonical (NVT) ensemble using Nosé-Hoover thermostats. The temperature was set as 573 K. The time step was set as 1 fs with a time period of 10 ps.

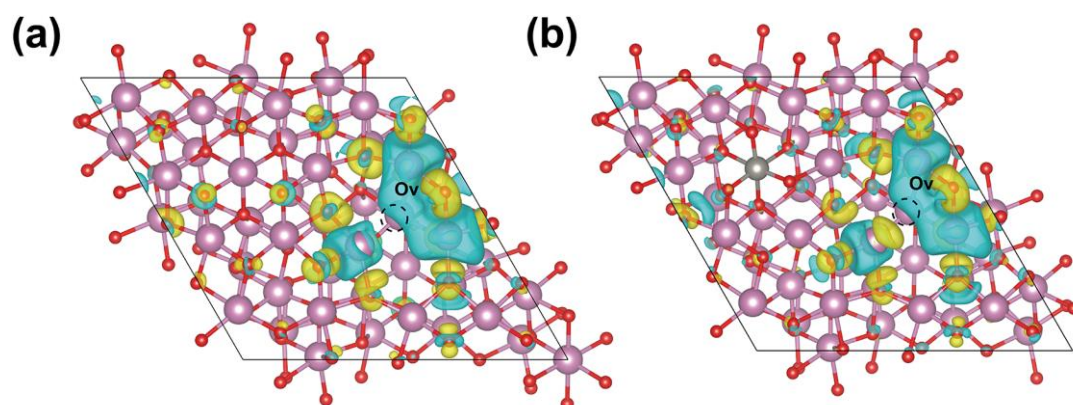

**Fig. S3** Deformation charge density for (a) the  $\text{In}_2\text{O}_3\_D$  model and (b) the  $\text{W-In}_2\text{O}_3\_D$  model. Blue isosurfaces represent depleted electron density region, whereas yellow isosurfaces represent accumulated electron density region. The iso-surface value is  $0.0025 \text{ |e|/bohr}^3$ .

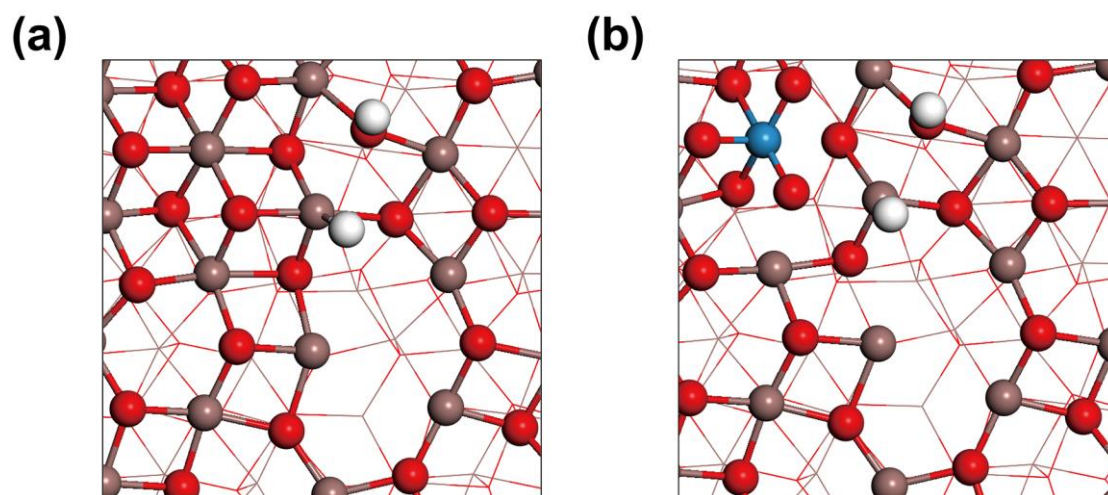

**Fig. S4** The configuration of the  $\text{H}_2$  dissociative adsorption on (a) the  $\text{In}_2\text{O}_3\_D$  model and (b) the  $\text{W-In}_2\text{O}_3\_D$  model. Red: O atoms; brown: In atoms; blue: W atom; white: H atoms.

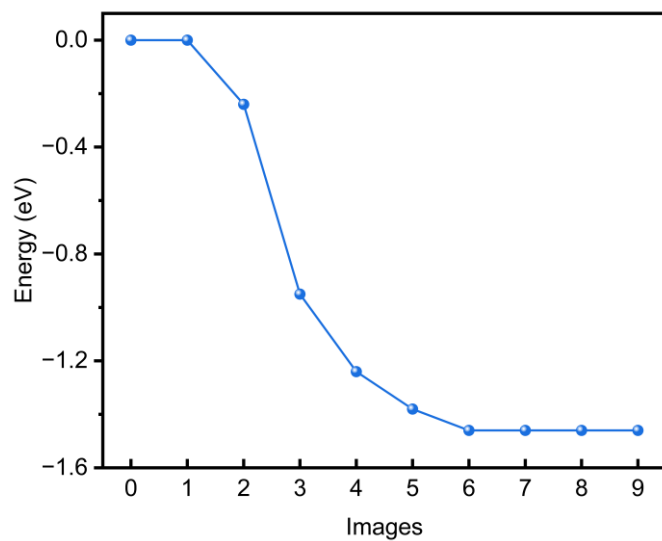

**Fig. S5** NEB path for the conversion of CO<sub>2</sub>\* and H adatom to the HCOO intermediate on the W-In<sub>2</sub>O<sub>3</sub>\_D model.

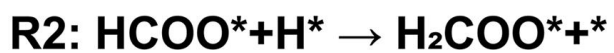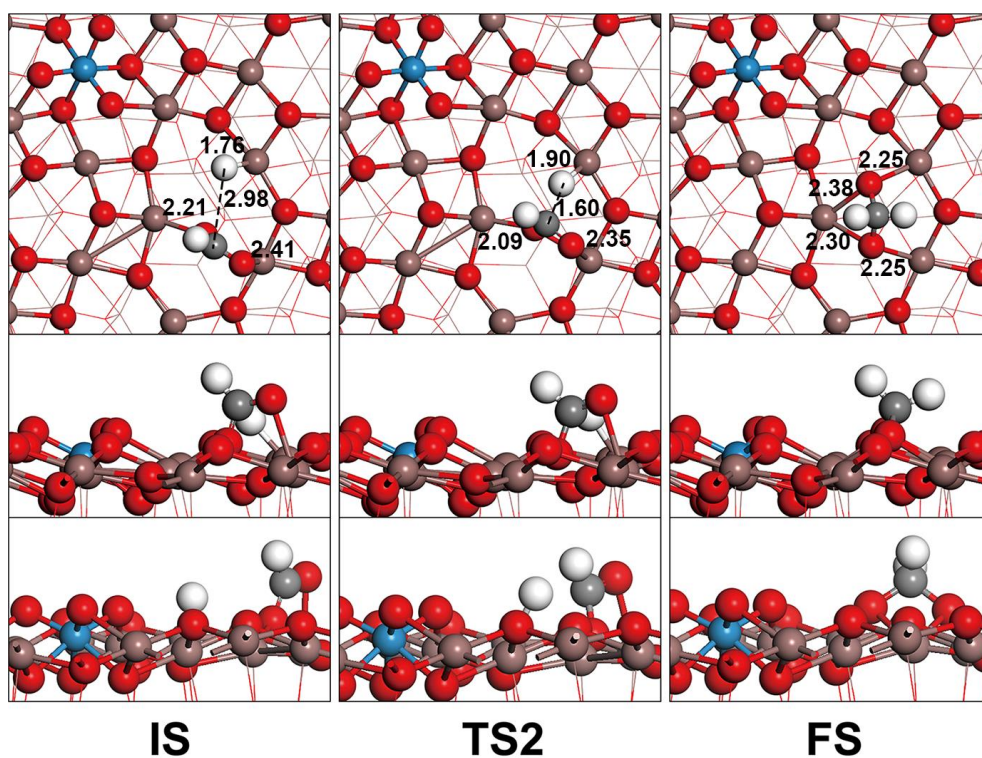

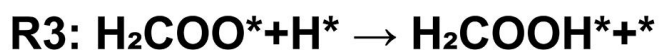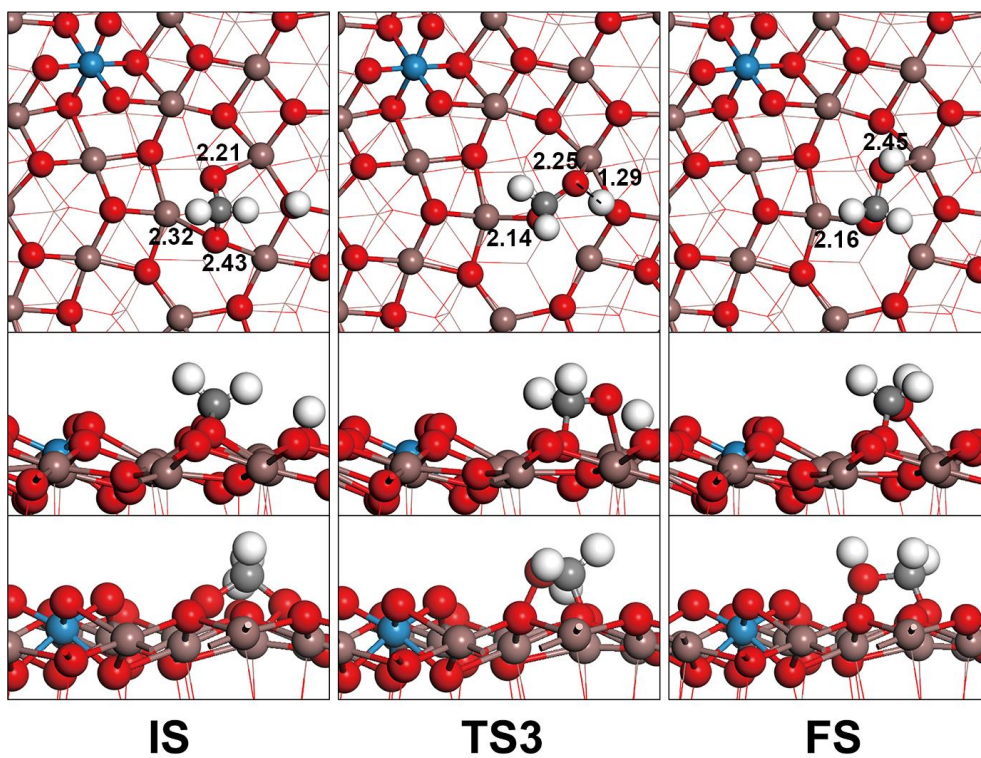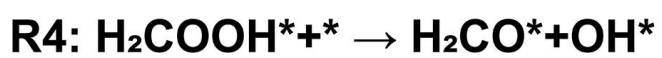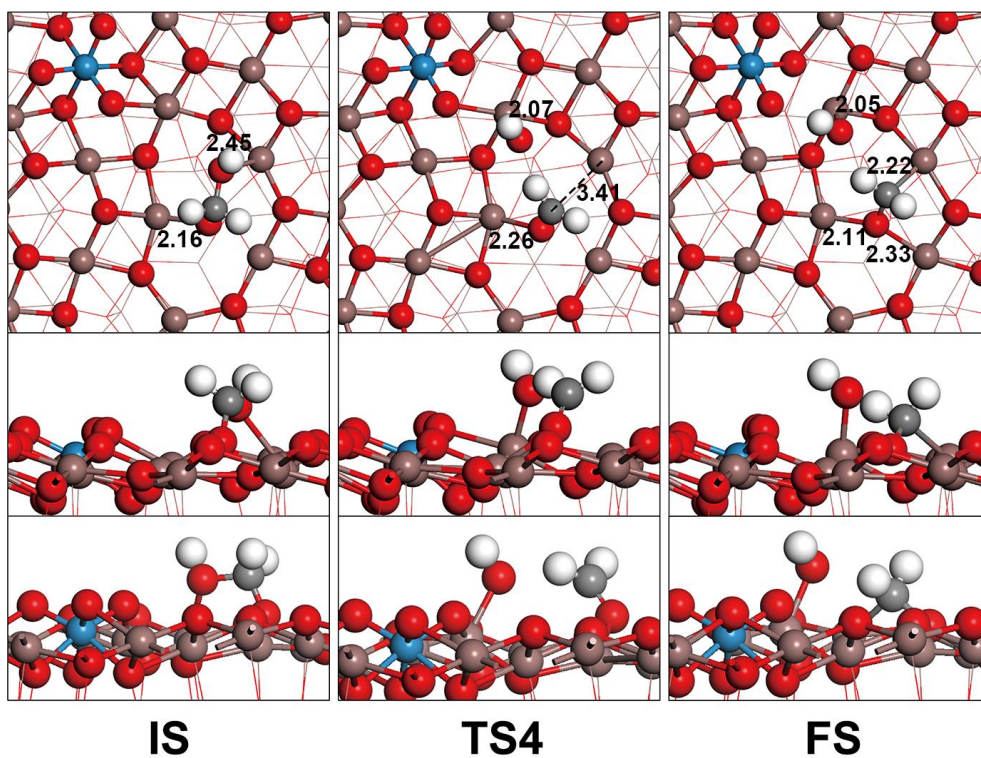

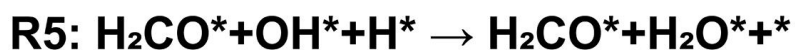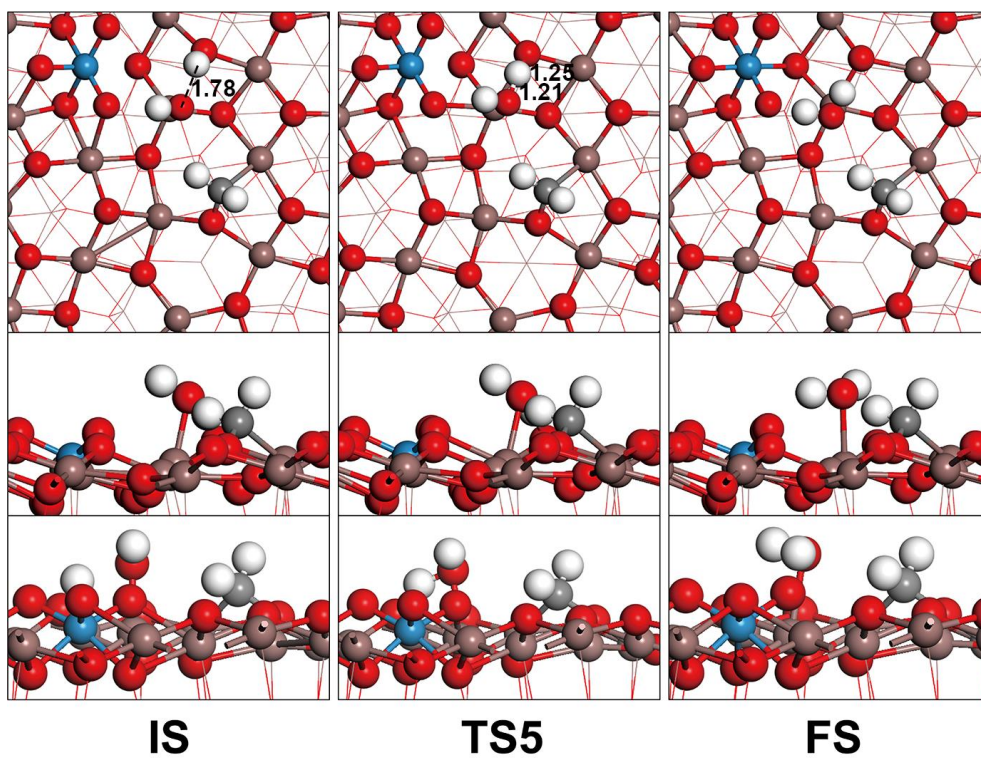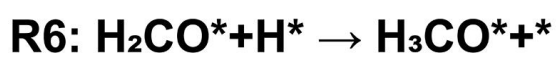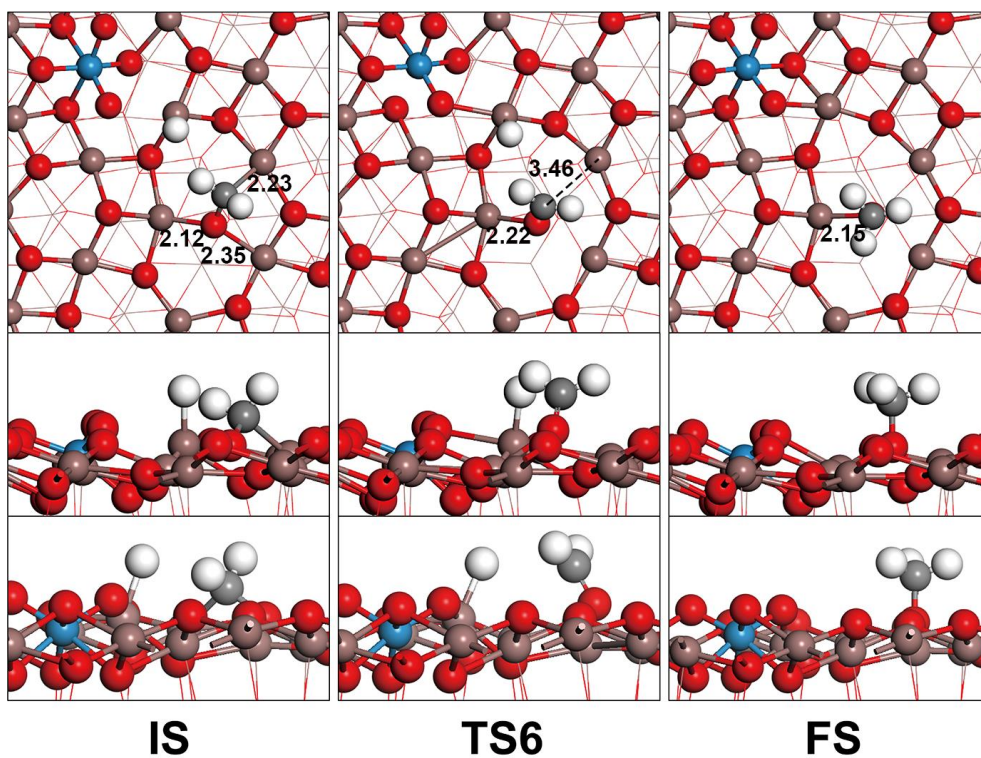

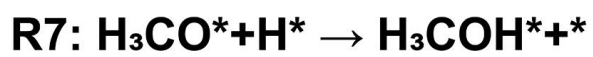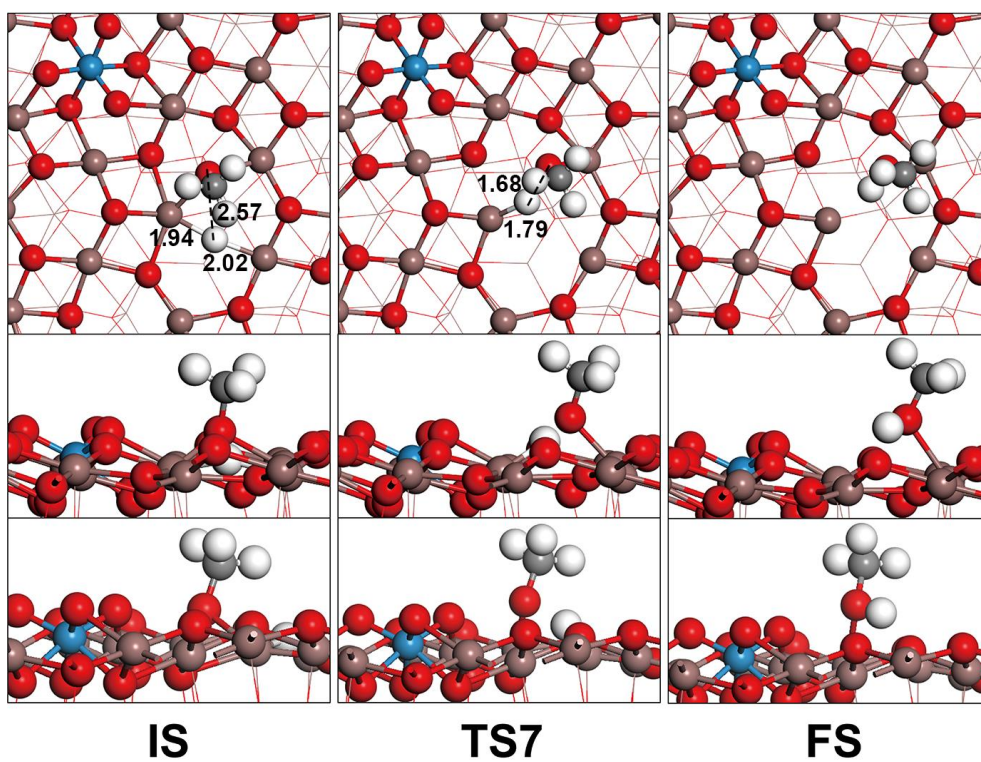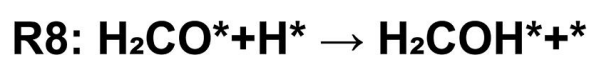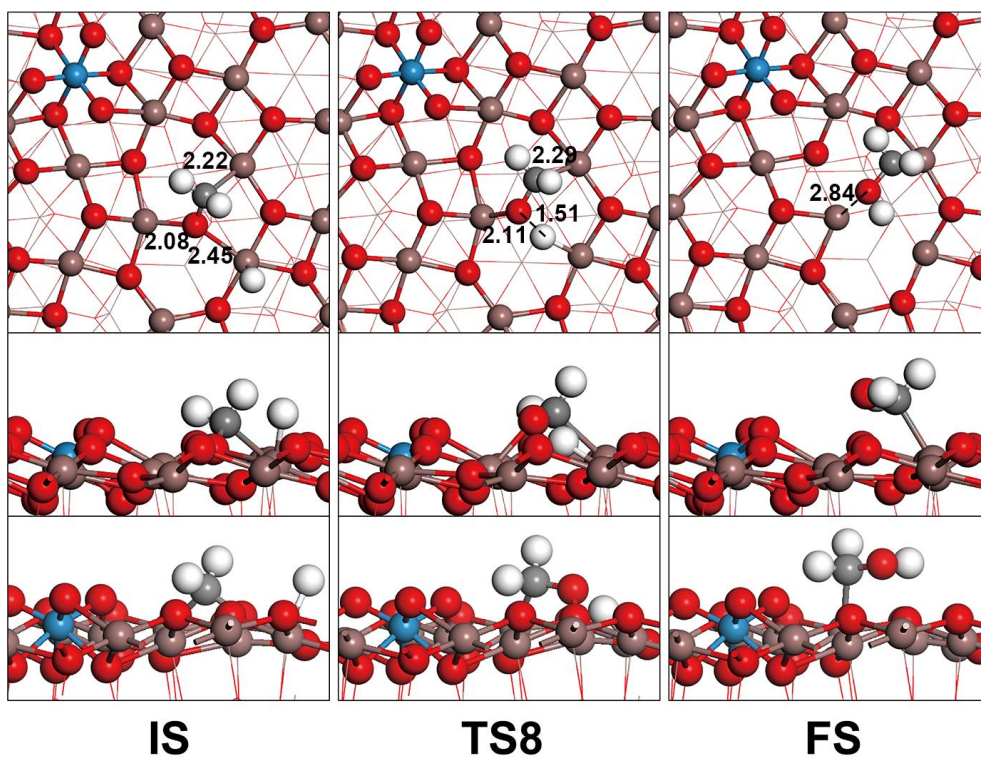

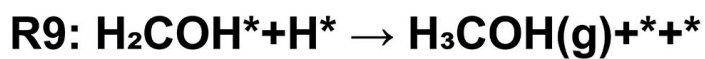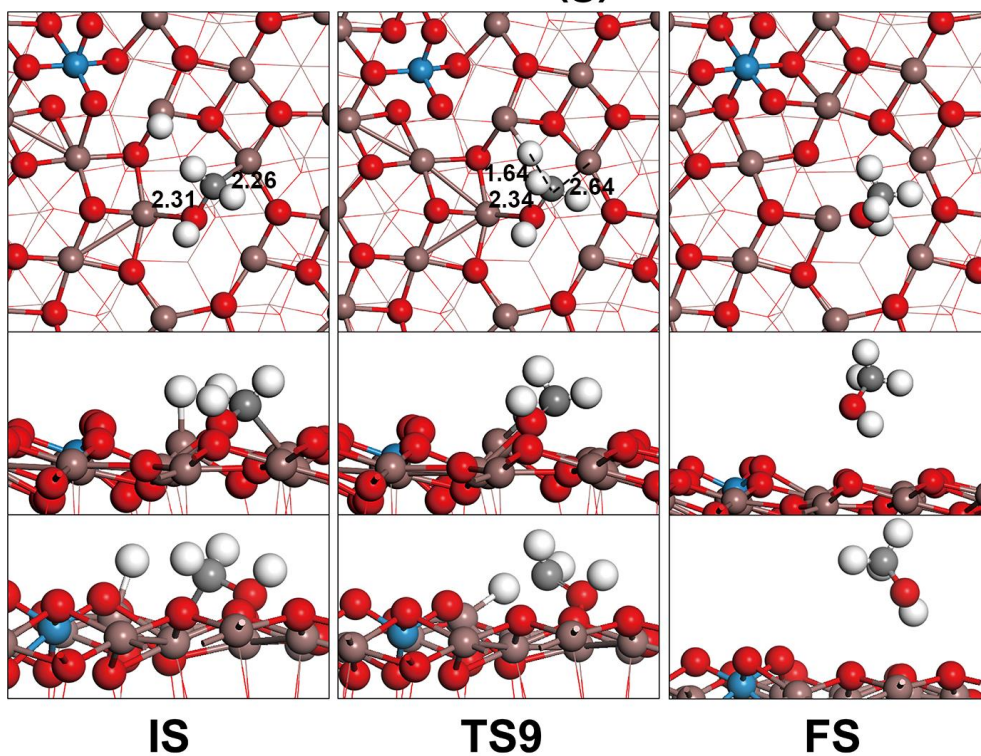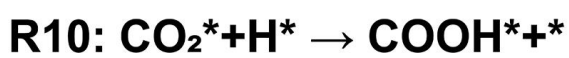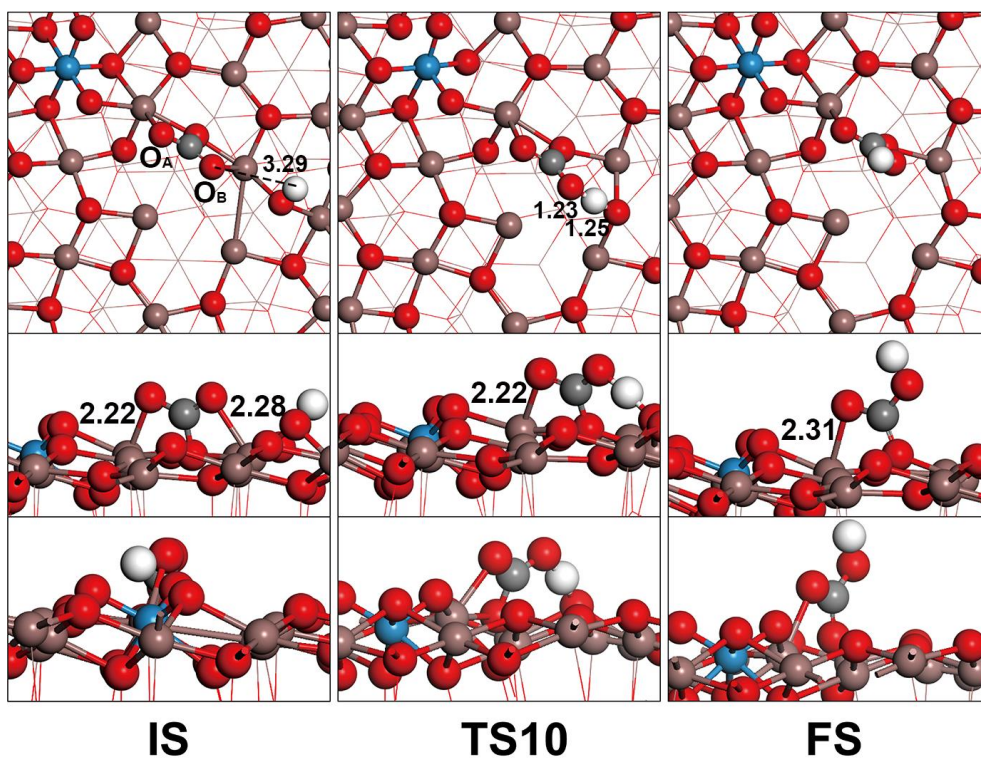



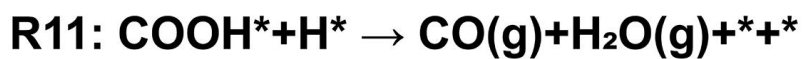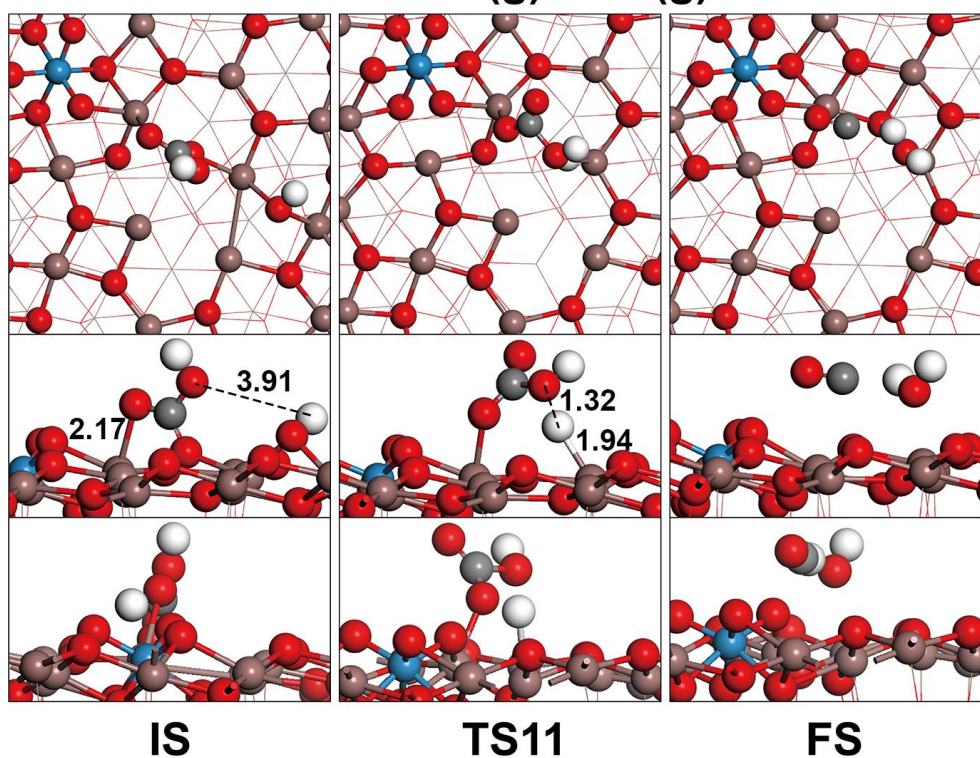

**Fig. S6** The top and side views of all initial, transition, and final states for the methanol synthesis and RWGS reaction on the W-In<sub>2</sub>O<sub>3</sub>-D model. Red: O atoms; brown: In atoms; blue: W atom; gray: C atom; white: H atoms. The bond length is in angstroms.

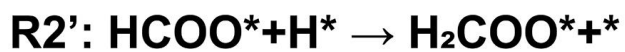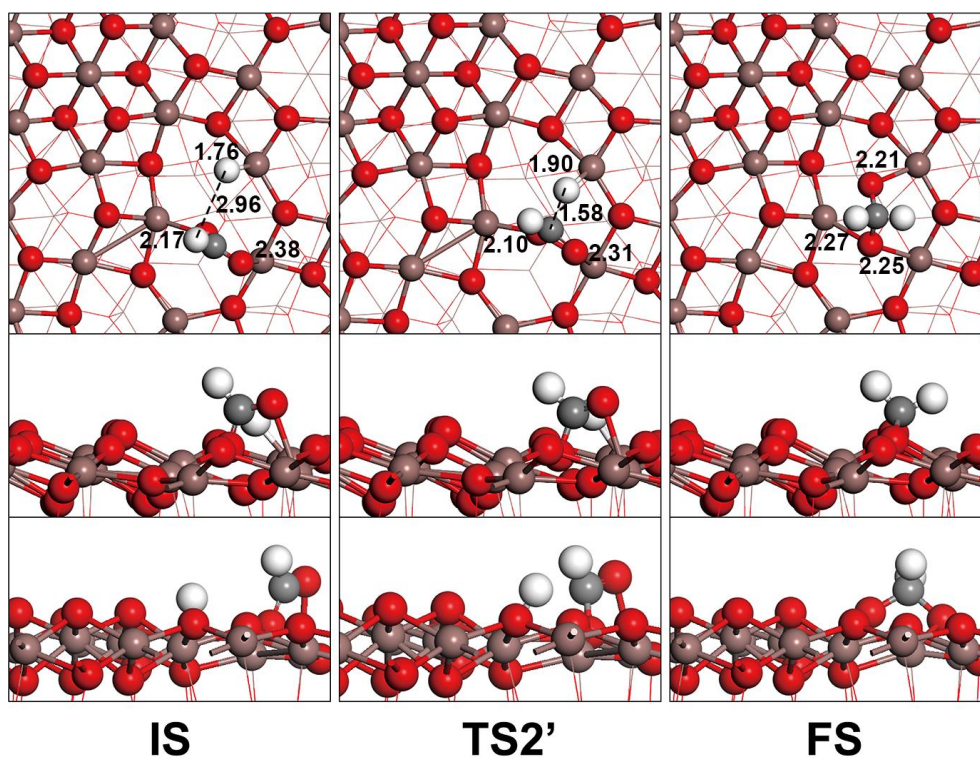

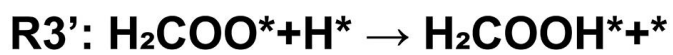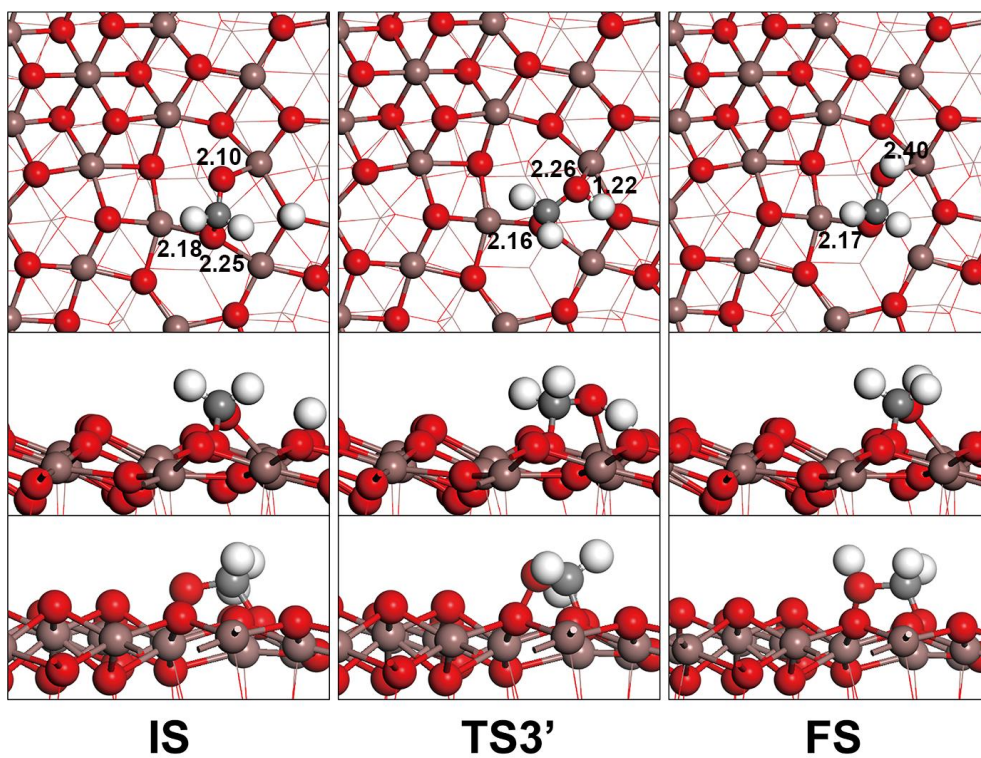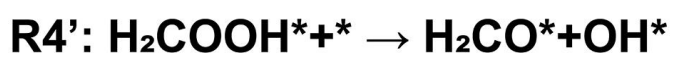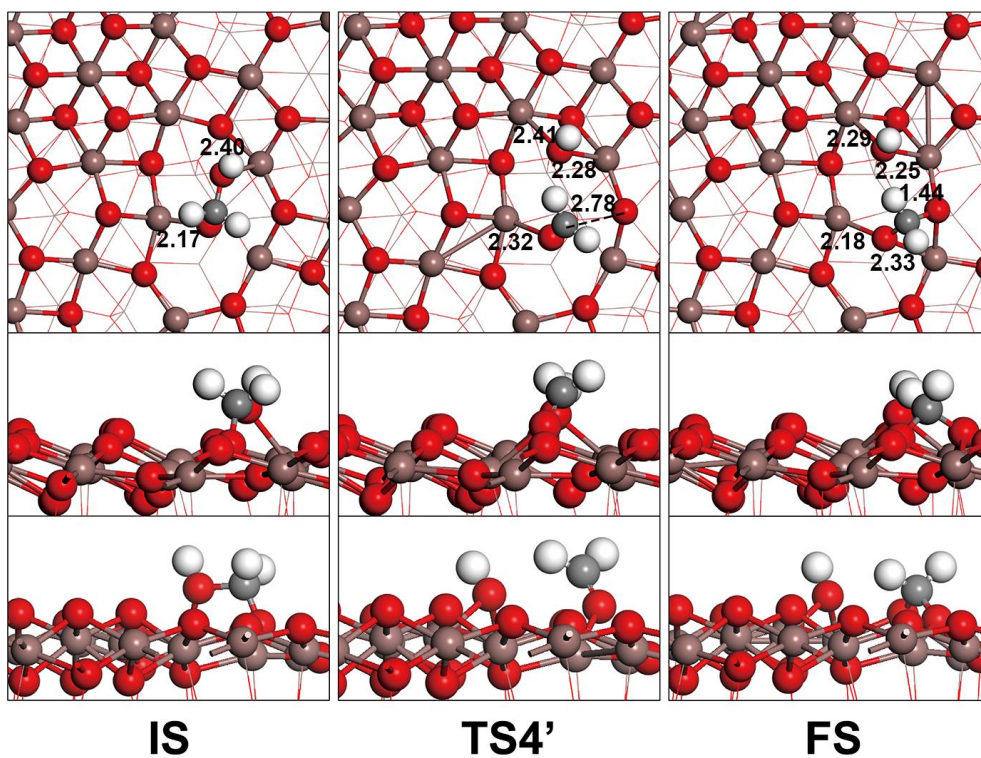

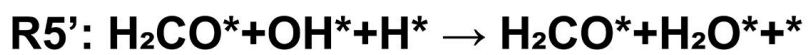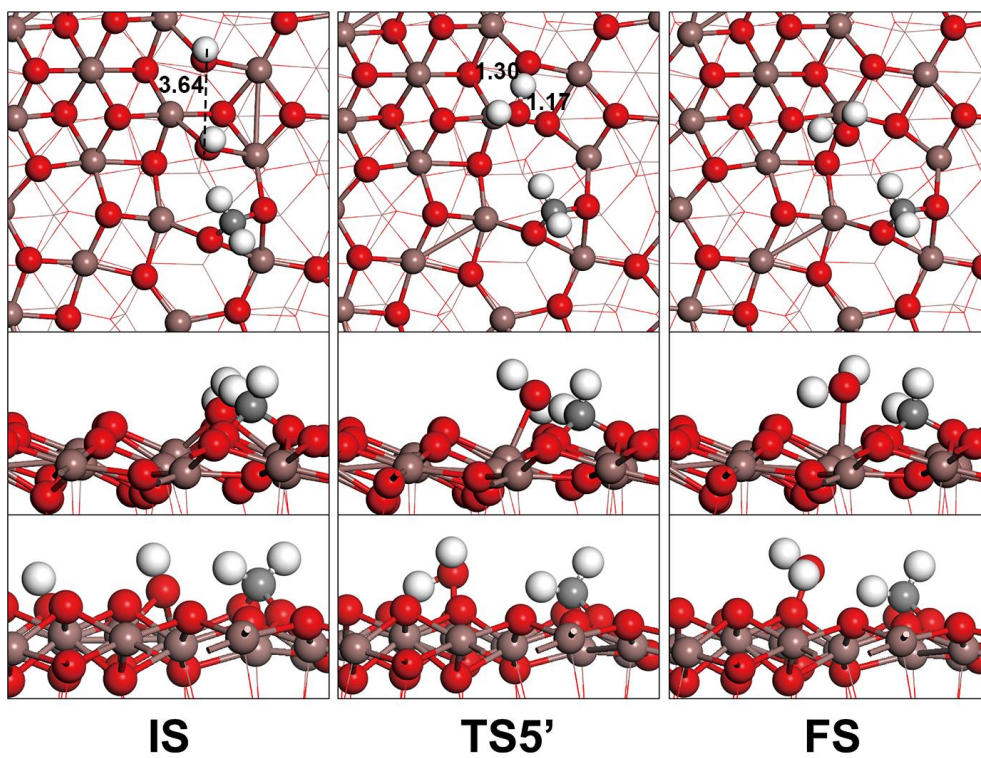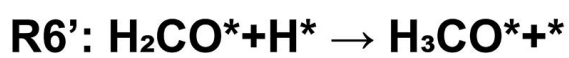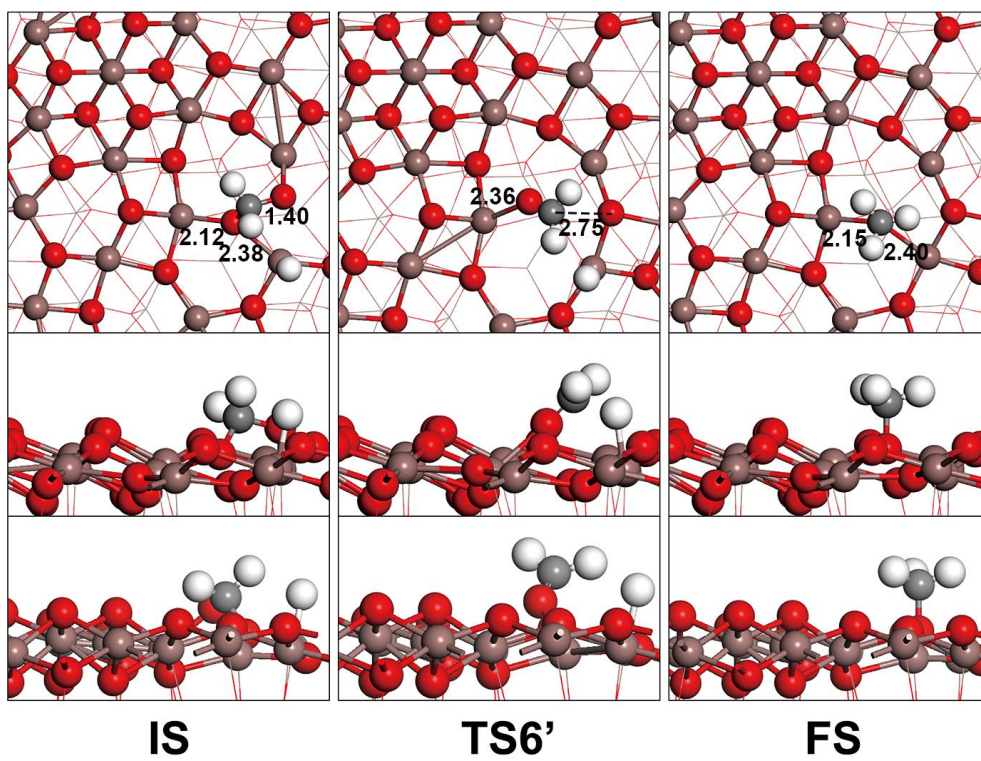

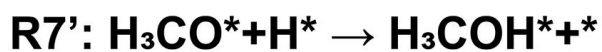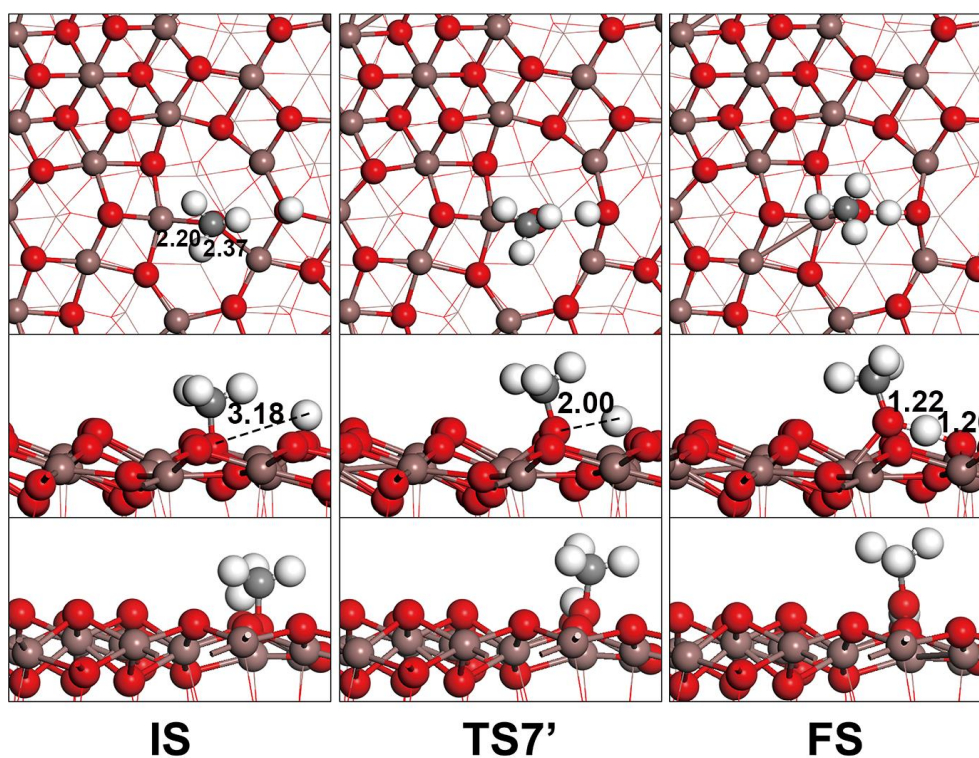

**Fig. S7** The top and side views of all initial, transition, and final states for the methanol synthesis on the  $\text{In}_2\text{O}_3\_D$  model. Red: O atoms; brown: In atoms; blue: W atom; gray: C atom; white: H atoms. The bond length is in angstroms.

**Table S1** The formation energy of W doping obtained by different doping positions

| doping position | formation energy (eV) |
|-----------------|-----------------------|
| In <sub>1</sub> | -11.12                |
| In <sub>2</sub> | -10.93                |
| In <sub>3</sub> | -11.07                |
| In <sub>4</sub> | -10.03                |
| In <sub>5</sub> | -8.29                 |
| In <sub>6</sub> | -9.72                 |

**Table S2** The degree of TOF control ( $X_{\text{TOF}}$ ) for each intermediate or transition state for the methanol synthesis on the W-In<sub>2</sub>O<sub>3</sub>\_D model and the In<sub>2</sub>O<sub>3</sub>\_D model

| X(TOF)      | H <sub>3</sub> CO* (W-In <sub>2</sub> O <sub>3</sub> ) | H <sub>2</sub> COH* (W-In <sub>2</sub> O <sub>3</sub> ) | H <sub>3</sub> CO* (In <sub>2</sub> O <sub>3</sub> ) |
|-------------|--------------------------------------------------------|---------------------------------------------------------|------------------------------------------------------|
| X(TOF, T1)  | 0.00                                                   | 0.00                                                    | 0.00                                                 |
| X(TOF, T2)  | 0.00                                                   | 0.00                                                    | 0.00                                                 |
| X(TOF, T3)  | 0.00                                                   | 0.00                                                    | 0.00                                                 |
| X(TOF, T4)  | 0.00                                                   | 0.00                                                    | 0.00                                                 |
| X(TOF, T5)  | 0.00                                                   | 0.00                                                    | 0.00                                                 |
| X(TOF, T6)  | 0.00                                                   | 0.00                                                    | 0.00                                                 |
| X(TOF, T7)  | 0.04                                                   | 0.00                                                    | 0.05                                                 |
| X(TOF, T8)  | 0.00                                                   | 0.00                                                    | 0.00                                                 |
| X(TOF, T9)  | 0.00                                                   | 0.00                                                    | 0.00                                                 |
| X(TOF, T10) | 0.00                                                   | 0.00                                                    | 0.00                                                 |
| X(TOF, T11) | 0.00                                                   | 0.00                                                    | 0.00                                                 |
| X(TOF, T12) | 0.96                                                   | 0.00                                                    | 0.95                                                 |
| X(TOF, T13) | 0.00                                                   | 0.00                                                    | 0.00                                                 |
| X(TOF, T14) | 0.00                                                   | 1.00                                                    | 0.00                                                 |
| X(TOF, T15) | 0.00                                                   |                                                         | 0.00                                                 |
| X(TOF, I1)  | 0.66                                                   | 0.72                                                    | 0.00                                                 |
| X(TOF, I2)  | 0.00                                                   | 0.00                                                    | 0.00                                                 |
| X(TOF, I3)  | 0.09                                                   | 0.10                                                    | 0.08                                                 |
| X(TOF, I4)  | 0.00                                                   | 0.00                                                    | 0.00                                                 |
| X(TOF, I5)  | 0.16                                                   | 0.18                                                    | 0.00                                                 |
| X(TOF, I6)  | 0.00                                                   | 0.00                                                    | 0.00                                                 |
| X(TOF, I7)  | 0.00                                                   | 0.00                                                    | 0.00                                                 |
| X(TOF, I8)  | 0.00                                                   | 0.00                                                    | 0.00                                                 |
| X(TOF, I9)  | 0.00                                                   | 0.00                                                    | 0.00                                                 |
| X(TOF, I10) | 0.00                                                   | 0.00                                                    | 0.00                                                 |
| X(TOF, I11) | 0.00                                                   | 0.00                                                    | 0.00                                                 |
| X(TOF, I12) | 0.00                                                   | 0.00                                                    | 0.00                                                 |
| X(TOF, I13) | 0.06                                                   | 0.00                                                    | 0.90                                                 |
| X(TOF, I14) | 0.00                                                   | 0.00                                                    | 0.02                                                 |
| X(TOF, I15) | 0.03                                                   |                                                         | 0.00                                                 |
